# Supplementary material for: Lipocalin-2 expression in hypoxic murine osteocytes enhances RANKL-induced osteoclastogenesis
Source: Research Square preprint supplement (doi:10.21203/rs.3.rs-6679031/v1), 2025-06-02
Supplement: Supplementary file 1 [file ed5b89627c32a18ac2802c89.docx]

**Supplementary Fig. S1**

**Supplementary Fig. S1** Full-length blot corresponding to Figure 5a. The cropped area used in the main figure is indicated by a black rectangle. (a) phospho-ERK1/2, (b) ERK1/2, (c) phospho-p38, (d) p38, (e) phospho-JNK, (f) JNK, and (g) β-actin.
